# Supplementary material for: Transient Receptor Potential C 1/4/5 Is a Determinant of MTI-101 Induced Calcium Influx and Cell Death in Multiple Myeloma
Source: MDPI journal article supplement (doi:10.3390/cells10061490), 2021-06-13
Supplement: s1 [file s1]

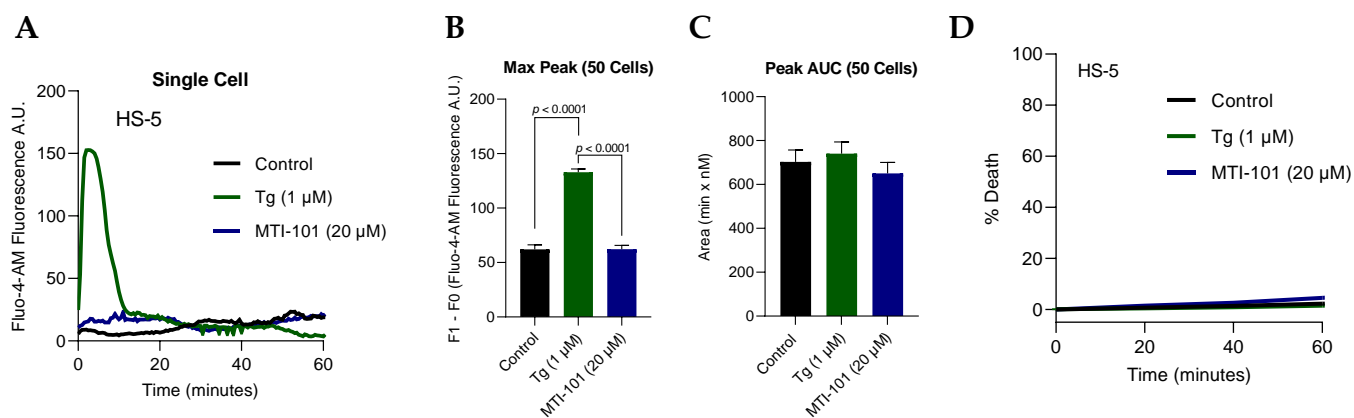

**Figure S1. Stroma cells are not sensitive to MTI-101-induced  $\text{Ca}^{2+}$  flux and cell death: A and B)**

The effect of MTI-101 was compared to thapsigargin (Tg) by measuring  $\text{Ca}^{2+}$  influx using Fluo-4-AM fluorescence intensity in HS-5 cell line. The line graph shows a single cell tracing for  $\text{Ca}^{2+}$  influx following treatment with MTI-101 (20  $\mu\text{M}$ ) and Tg (1  $\mu\text{M}$ ). The individual cells were chosen based on the median peak for  $\text{Ca}^{2+}$  influx for the respective treatment group. Cells were imaged every 30 seconds. **B)** Mean maximum peak of  $\text{Ca}^{2+}$  influx in 50 cells in HS-5 cell line. Error bars represent SEM ( $p < 0.05$  One-way ANOVA, inter-group comparison was done by Tukey's multiple comparisons test  $p < 0.05$ ). **C)** The total levels of  $\text{Ca}^{2+}$  influx mediated by MTI-101, Tg, and vehicle control was measured by calculating the peak area under the curve (Peak AUC) of the 50 cells ( $p < 0.05$  One-way ANOVA, inter-group comparison was done by Tukey's multiple comparisons test  $p < 0.05$ ). **D)** The effect of MTI-101 (20  $\mu\text{M}$ ) and Tg (1  $\mu\text{M}$ ) on cell death was measured in HS-5 cells by imaging the respective treatment group every 5 minutes for one hour. Cell death was determined by a threshold of DAPI fluorescence indicative of a dead cell. Error bars represent SEM ( $p < 0.05$  one-way ANOVA).

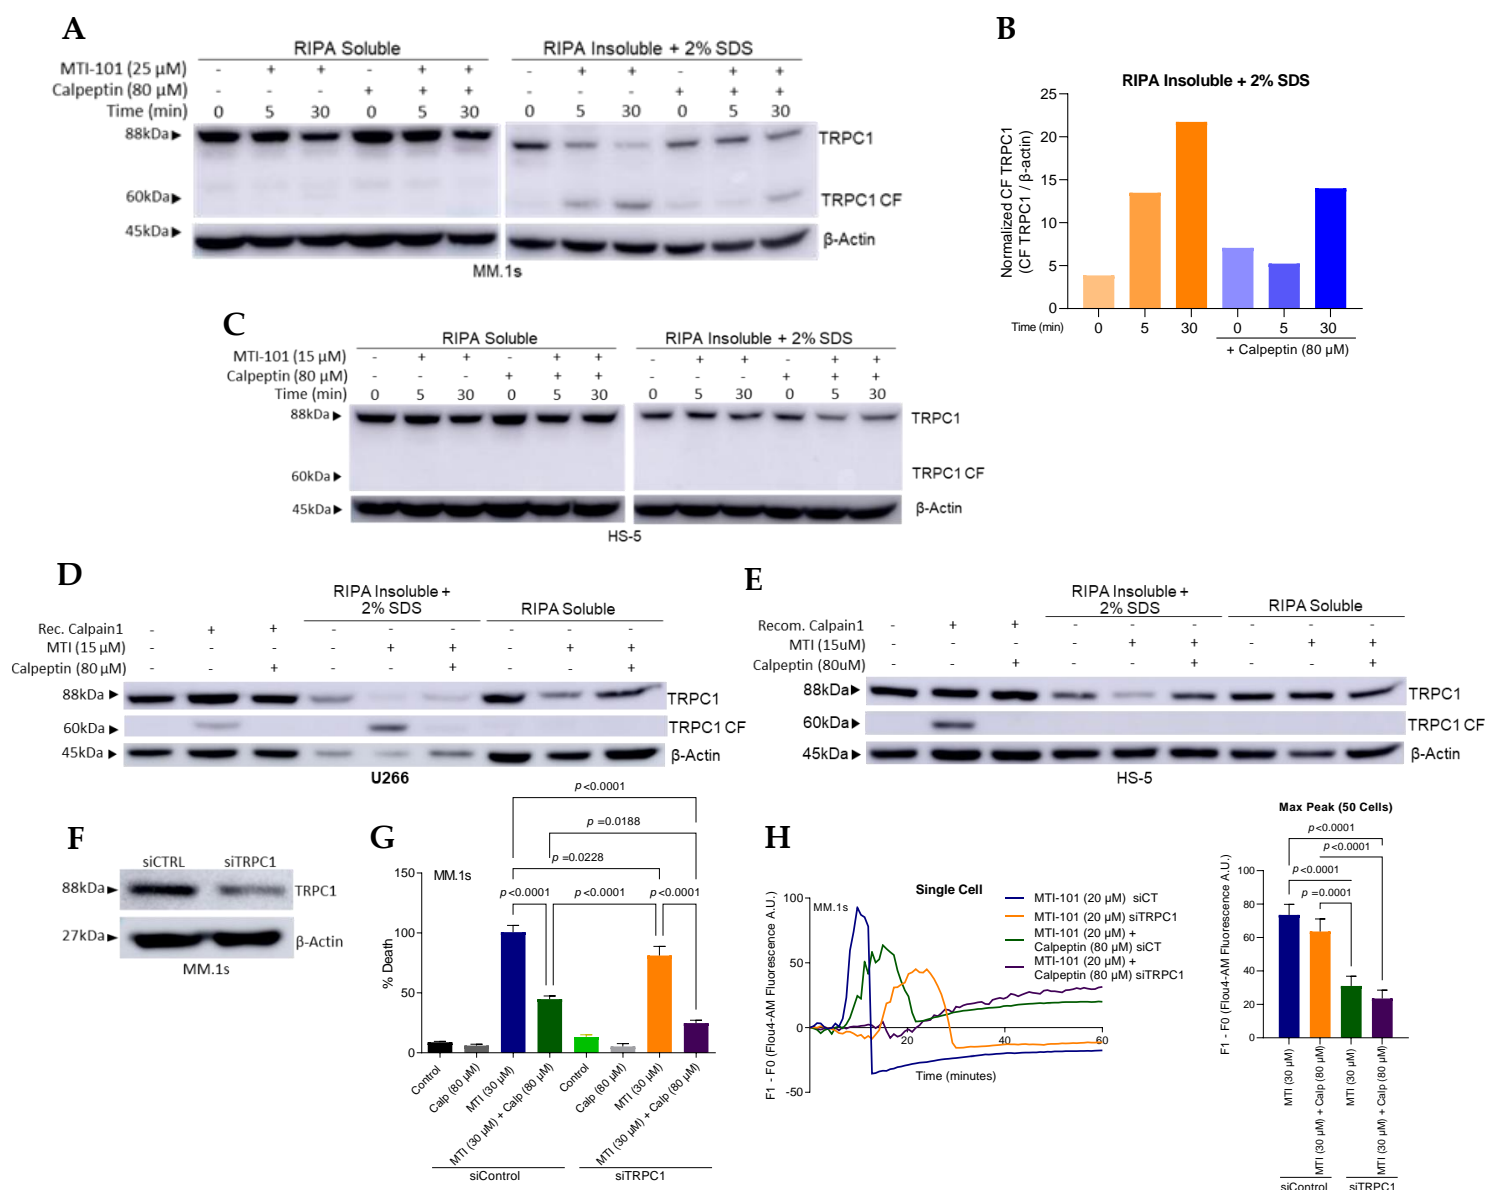

**Figure S2: MTI-101 induces TRPC1 Truncation by Calpain Activation:** **A and B)** MM.1s cells pretreated with calpeptin (80  $\mu$ M) for one hour, followed by treatment with MTI-101 (25  $\mu$ M) for 0, 5, 30 minutes. TRPC1 cleaved fractions was detected at  $\approx$ 60 kDa in the calpeptin-free group in the RIPA insoluble compartment. Quantification of the cleaved fraction TRPC1 normalized to  $\beta$ -actin. **C)** MTI-101 (15  $\mu$ M) does not induce TRPC1 cleavage in HS-5 cells in both RIPA Soluble and Insoluble compartments. **D)**  $\text{CaCl}_2$  activated calpain I induced TRPC1 cleaved fraction at  $\approx$ 60kDa in U266 cells following 1-hour incubation with the recombinant protein. Pre-treating cells with calpeptin (80  $\mu$ M) for 1 hour abrogated TRPC1 cleavage. **E)**  $\text{CaCl}_2$  activated calpain I induced TRPC1 cleaved fraction at  $\approx$ 60kDa in HS-5 cells. Pre-treating

cells with calpeptin (80  $\mu$ M) for 1 hour abrogated TRPC1 cleavage, while no cleavage was seen with MTI-101 treatment. F) Western blot analysis for TRPC1 expression levels in MM.1s cells. G) Effect of knocking down TRPC1 in MM.1s cells on cell death mediated by MTI-101 (30  $\mu$ M) at 1 hour ( $p < 0.05$  One-way ANOVA). H) Single cell tracing for  $\text{Ca}^{2+}$  influx in Fluo-4-AM loaded MM.1s with siTRPC1 and siControl. Cells were treated with MTI-101 (30  $\mu$ M) with or without one-hour pre-treatment with calpeptin (80  $\mu$ M). Cells imaged every 30 seconds for one-hour. Mean maximum peak of  $\text{Ca}^{2+}$  influx in 50 cells in MM.1s cell line. Error bars represent SEM ( $p < 0.05$  One-way ANOVA, inter-group comparison was done by Tukey's multiple comparisons test  $p < 0.0001$ ).
